## Evolution of DNA methylation in *Papio* baboons

Tauras Vilgalys<sup>1</sup>, Jeffrey Rogers<sup>2,3</sup>, Clifford Jolly<sup>4,5,6</sup>, Baboon Genome Analysis Consortium,  
Sayan Mukherjee<sup>7,8,9</sup>, Jenny Tung\*<sup>1,10,11,12</sup>

<sup>1</sup>: Department of Evolutionary Anthropology, Duke University, Durham, NC

<sup>2</sup>: Human Genome Sequencing Center, Baylor College of Medicine, Houston, TX

<sup>3</sup>: Department of Molecular and Human Genetics, Baylor College of Medicine, Houston, TX

<sup>4</sup>: Department of Anthropology, New York University, New York, NY

<sup>5</sup>: Center for the Study of Human Origins, New York University, New York, NY

<sup>6</sup>: New York Consortium for Evolutionary Primatology

<sup>7</sup>: Department of Statistical Science, Duke University, Durham, NC

<sup>8</sup>: Department of Mathematics, Duke University, Durham, NC

<sup>9</sup>: Department of Computer Science, Duke University, Durham, NC

<sup>10</sup>: Department of Biology, Duke University, Durham, NC

<sup>11</sup>: Duke University Population Research Institute, Duke University, Durham, NC

<sup>12</sup>: Institute of Primate Research, National Museums of Kenya, Karen, Nairobi, Kenya

\*Corresponding author: Jenny Tung, [jt5@duke.edu](mailto:jt5@duke.edu)

Other author emails: [tauras.vilgalys@duke.edu](mailto:tauras.vilgalys@duke.edu), [jr13@bcm.edu](mailto:jr13@bcm.edu), [clifford.jolly@nyu.edu](mailto:clifford.jolly@nyu.edu),  
[sayan@stat.duke.edu](mailto:sayan@stat.duke.edu)

## 1 **Abstract**

2           Changes in gene regulation have long been thought to play an important role in primate  
3 evolution. However, although a number of studies have compared genome-wide gene expression  
4 patterns across primate species, fewer have investigated the gene regulatory mechanisms that  
5 underlie such patterns, or the relative contribution of drift versus selection. Here, we profiled  
6 genome-scale DNA methylation levels from five of the six extant species of the baboon genus  
7 *Papio* (4–14 individuals per species). This radiation presents the opportunity to investigate DNA  
8 methylation divergence at both shallow and deeper time scales (380,000 – 1.4 million years). In  
9 contrast to studies in human populations, but similar to studies in great apes, DNA methylation  
10 profiles clearly mirror genetic and geographic structure. Divergence in DNA methylation  
11 proceeds fastest in unannotated regions of the genome and slowest in regions of the genome that  
12 are likely more constrained at the sequence level (e.g., gene exons). Both heuristic approaches  
13 and Ornstein-Uhlenbeck models suggest that DNA methylation levels at a small set of sites have  
14 been affected by positive selection, and that this class is enriched in functionally relevant  
15 contexts, including promoters, enhancers, and CpG islands. Our results thus indicate that the rate  
16 and distribution of DNA methylation changes across the genome largely mirror genetic structure.  
17 However, at some CpG sites, DNA methylation levels themselves may have been a target of  
18 positive selection, pointing to loci that could be important in connecting sequence variation to  
19 fitness-related traits.

20

## 21 **Introduction**

22           Changes in gene regulation have long been hypothesized to play an important role in trait  
23 evolution (Britten and Davidson 1971; King and Wilson 1975; Jacob 1977; Wray 2007; Stern  
24 and Orgogozo 2008). Regulatory changes have the potential to be more modular, and hence more  
25 specific to the individual tissues, environmental conditions, or developmental time points  
26 targeted by selection, than protein-coding changes (Stern 2000). In addition, regulatory regions  
27 are believed to have larger mutational target sizes, increasing the rate at which they may evolve  
28 (Landry, et al. 2007). In support of the importance of regulatory evolution, a number of studies  
29 have identified regulatory changes that contribute to species-specific adaptations. For example,  
30 non-coding variants that regulate the *ectodysplasin* and *pitx1* genes underlie morphological  
31 changes that separate saltwater threespine sticklebacks (*Gasterosteus aculeatus*) from their close

32 freshwater relatives (Colosimo, et al. 2004; Shapiro, et al. 2004; Colosimo, et al. 2005).  
33 Similarly, wing pattern mimicry in *Heliconius* butterflies has been repeatedly shaped by  
34 regulatory evolution near the *optix* gene, in which convergent changes at different *cis*-regulatory  
35 variants have produced similar patterns of wing coloration (Reed, et al. 2011; Heliconius  
36 Genome Consortium 2012). Together, these and other case studies (e.g. Abzhanov, et al. 2004;  
37 Prud'Homme, et al. 2006; Manceau, et al. 2011; Jones, et al. 2012; Poelstra, et al. 2014) provide  
38 compelling examples of the importance of regulatory sequence changes to adaptive evolution.

39         However, evaluating the role of gene regulation in adaptive trait evolution also requires  
40 understanding the genome-wide distribution of selectively relevant regulatory variants. To  
41 address this question, two approaches have commonly been employed: sequence-based tests for  
42 selection and comparative analyses of gene expression phenotypes themselves. The first  
43 approach has identified signatures of natural selection in regulatory regions both within and  
44 between species (e.g., Pollard, et al. 2006; Prabhakar, et al. 2006; Kosiol, et al. 2008). In  
45 primates, for example, genes associated with developmental or neuronal functions have been  
46 argued to contain more signatures of positive selection in noncoding regions than in their coding  
47 sequences (Haygood, et al. 2010). Relative to other genetic variants, loci that affect gene  
48 expression in humans also have larger integrated haplotype scores, providing evidence for recent  
49 positive selection (Nédélec, et al. 2016; Kim-Hellmuth, et al. 2017). Consistent with these  
50 findings, variants associated with disease risk, fecundity, and other selectively relevant traits are  
51 often found within non-coding regions, and likely affect gene expression levels (Nicolae, et al.  
52 2010; Wray 2013).

53         The second approach investigates patterns of gene expression across species to search for  
54 cases consistent with adaptive evolution. Several patterns have emerged from this work. First,  
55 overall differences in gene expression accumulate over evolutionary time, such that more closely  
56 related species have more similar gene expression profiles. Global clustering approaches from  
57 the same tissue thus tend to faithfully reproduce the species phylogeny (Brawand, et al. 2011;  
58 Sudmant, et al. 2015), and exceptions to this pattern suggest possible cases of natural selection.  
59 For example, gene expression levels in testis, but not in other tissues, group humans and gorillas  
60 to the exclusion of chimpanzees and bonobos (Brawand, et al. 2011). This pattern is consistent  
61 with elevated sexual selection on male reproductive physiology in chimpanzees and bonobos,  
62 which are characterized by unusually large testis to body size ratios relative to other primates

63 (Schultz 1938). Second, stabilizing selection appears to constrain most gene expression levels.  
64 Comparative analyses of gene expression have found that most genes are characterized by low  
65 levels of intra- and inter-specific divergence, a pattern consistent with stabilizing selection  
66 (Rifkin, et al. 2003; Gilad, et al. 2006a; Khaitovich, et al. 2006; Blekhman, et al. 2008; Coolon et  
67 al. 2014; Hodgins-Davis et al. 2015). Furthermore, within species, regulatory variants of large  
68 effect tend to have low allele frequencies, suggesting that they are typically selected against  
69 (Battle, et al. 2014; Hernandez, et al. 2017; Schoech, et al. 2017). In support of this argument,  
70 experimental mutation accumulation lines exhibit an excess of gene expression variation  
71 compared to that observed in natural populations. They also accumulate differences in gene  
72 expression at a faster rate than observed in between-species comparisons (Denver, et al. 2005;  
73 Rifkin, et al. 2005).

74 Thus, both sequence-based studies and comparative studies of gene expression support a  
75 central role for selection on gene expression evolution, dominated by stabilizing selection but  
76 with an additional contribution made by positive selection (Signor and Nuzhdin 2018). However,  
77 gene expression patterns themselves are a product of multiple underlying regulatory  
78 mechanisms, which govern chromatin accessibility, transcription factor binding, and mRNA  
79 processing, splicing, and stability. These mechanisms link genetic variation in DNA sequence to  
80 selectively relevant gene expression phenotypes (Gallego Romero, et al. 2012; Pai and Gilad  
81 2014). For example, in humans, genetic variants that affect chromatin accessibility and DNA  
82 methylation often affect gene expression as well, indicating that these mechanisms functionally  
83 link DNA sequence variation to gene expression (Degner, et al. 2012; Banovich, et al. 2014;  
84 Gate, et al. 2018). Between species, however, we know considerably less about how gene  
85 regulatory mechanisms evolve, including their relative contributions to lineage-specific shifts in  
86 gene expression levels (Pai and Gilad 2014).

87 Comparative studies to date have focused most intensively on DNA methylation, an  
88 epigenetic regulatory mechanism that refers to the covalent addition of a methyl group to a  
89 cytosine base and that can affect transcription factor binding, chromatin accessibility, and gene  
90 expression (Klose and Bird 2006; Weber, et al. 2007; Jones 2012; but see also Shibata, et al.  
91 2012; Zhou, et al. 2014; Villar, et al. 2015; Berthelot, et al. 2018 for work on other mechanisms).  
92 In primates, comparisons between humans, chimpanzees, and rhesus macaques suggest that  
93 divergence in DNA methylation is associated with changes in gene expression (Zeng, et al. 2012;

94 Heyn, et al. 2013), explaining 15-21% of expression differences between species (Pai, et al.  
95 2011). Like gene expression, divergence in DNA methylation also increases with genetic  
96 distance (Hernando-Herraez, et al. 2013). However, comparisons among human populations  
97 suggest that DNA methylation evolves in a more clock-like fashion than gene expression,  
98 possibly because gene expression phenotypes evolve under greater functional constraint (Carja,  
99 et al. 2017). Unlike for gene expression levels (Rifkin, et al. 2003; Gilad, et al. 2006a;  
100 Khaitovich, et al. 2006; Whitehead and Crawford 2006; Blekhman, et al. 2010; Brawand, et al.  
101 2011; Rohlf and Nielsen 2014), the relative contribution of genetic drift and natural selection to  
102 DNA methylation evolution across species has not been investigated.

103 Here, we address this gap by investigating the evolution of genome-wide DNA  
104 methylation levels in the baboon genus *Papio*. Baboons radiated in sub-Saharan Africa over the  
105 past 1.4 million years to include six currently recognized extant species: anubis baboons (*P.*  
106 *anubis*, also called the olive baboon), hamadryas baboons (*P. hamadryas*), and Guinea baboons  
107 (*P. papio*) in the northern half of Africa and the Arabian peninsula; and yellow baboons (*P.*  
108 *cynocephalus*), chacma baboons (*P. ursinus*), and Kinda baboons (*P. kindae*) in central and  
109 southern Africa (Fig. 1A: Jolly 1993; Rogers, et al. *in review*). Studying DNA methylation  
110 divergence in this species complex thus provides additional resolution on the rate of DNA  
111 methylation evolution in primates, as previous studies have concentrated either on deeply  
112 diverged great apes (5 – 15 million years of divergence) or on closely related human populations  
113 (Pai, et al. 2011; Hernando-Herraez, et al. 2013; Heyn, et al. 2013; Hernando-Herraez, et al.  
114 2015; Mendizabal, et al. 2016; Carja, et al. 2017). Genetic evidence indicates that branching  
115 events leading to the extant baboon species occurred on an intermediate time-scale, between  
116 0.380 and 1.4 – 2.0 million years ago (Zinner, et al. 2013; Rogers, et al. *in review*). Further,  
117 because baboon genetic diversity is unusually well-characterized (Wall, et al. 2016; Leffler  
118 2017), focusing on baboons also allowed us to investigate the relationship between DNA  
119 methylation and patterns of genetic variation across the genome.

120 To do so, we generated genome-scale bisulfite sequencing data for 4 – 14 members of  
121 each of five of the extant species (all but chacma baboons). We asked: (i) to what degree does  
122 phylogenetic divergence between baboon species predict evolutionary change in DNA  
123 methylation levels? (ii) how are clade- and species-specific shifts in DNA methylation  
124 distributed across the baboon genome? and (iii) what are the relative contributions of natural

125 selection and genetic drift to patterns of DNA methylation across species? Our results show that  
126 divergence in DNA methylation is closely linked to genetic divergence in baboons. Additionally,  
127 heterogeneity in DNA methylation divergence is explained by a combination of functional  
128 context, mean methylation level, and differences in selective constraint. At a subset of sites,  
129 these differences are consistent with lineage-specific selective shifts, suggesting candidate loci  
130 for which interspecific changes in gene expression may be explained by selection on DNA  
131 methylation.

132

## 133 **Results**

### 134 ***Genome-wide variation in DNA methylation reflects geography and phylogenetic structure***

135 We generated DNA methylation profiles for 39 baboons and 5 rhesus macaques (*Macaca*  
136 *mulatta*) (Table S1) using reduced representation bisulfite sequencing (RRBS: Gu, et al. 2011;  
137 Boyle, et al. 2012). After filtering for CpG sites where at least half of our study subjects were  
138 sequenced at a mean coverage of at least 5x, the data set included DNA methylation estimates  
139 for 2,450,153 CpG sites throughout the genome. As expected for RRBS data, these sites were  
140 strongly enriched in or near CpG dense regions of the genome, including CpG islands, CpG  
141 shores, gene bodies, and promoters (Fig. S1). At least one CpG site in the promoter or gene body  
142 was included for 75.2% of Ensembl-annotated protein-coding genes in the reference anubis  
143 baboon genome (*Panul2.0*; Fig. S1). To investigate patterns of DNA methylation variation across  
144 *Papio*, we subsequently focused on the subset of 756,262 CpG sites that were not constitutively  
145 hyper- or hypo-methylated (mean methylation level  $\in [10\%, 90\%]$  across all study subjects).  
146 Two of the species we sampled (hamadryas baboons and anubis baboons) included individuals  
147 from multiple source populations (Table S1). However, because source population was not  
148 significantly associated with variation in DNA methylation within species (Supplementary  
149 Methods), we grouped all samples from the same species together for subsequent analysis.

150 To investigate the relationship between DNA methylation levels and genetic divergence,  
151 we first performed principal components analysis (PCA) on the DNA methylation data. With  
152 rhesus macaques included, the first principal component explained 14% of the overall variance in  
153 the data and separated all baboons from all rhesus macaques (Fig. S2). Subsequent PCs captured  
154 variation within *Papio* and were highly correlated with the top PCs when considering baboon  
155 samples only ( $r^2 > 0.96$  between PCs 2-5 including macaques and PCs 1-4 excluding macaques).

156 To investigate species differences within *Papio*, we subsampled the baboon data to 4 individuals  
157 for each species (based on the smallest sample size per species, for Kinda baboons) and analyzed  
158 the baboon samples alone. In most subsets (79.6%), PC1 and PC2 mirror the phylogenetic  
159 history of the baboon species we sampled (Fig. 1A). They first separated baboons from the  
160 northern clade from baboons from the southern clade (PC1), and then separated hamadryas  
161 baboons from all other taxa (PC2). To explicitly compare structure in the DNA methylation data  
162 to baboon genetic structure, we used Procrustes analyses on the DNA methylation data set and  
163 genotype data collected from the same RRBS data (n=49,607 SNPs; Supplementary Methods).  
164 The first two PCs of the genotype data were significantly concordant with the first two PCs of  
165 the DNA methylation data (Fig. 1B; Procrustes  $t_0 = 0.89$ ,  $p < 10^{-6}$ ), indicating that divergence in  
166 CpG methylation levels is closely tied to genetic divergence (near-identical results were obtained  
167 when including additional PCs, up to PC 6).  
168

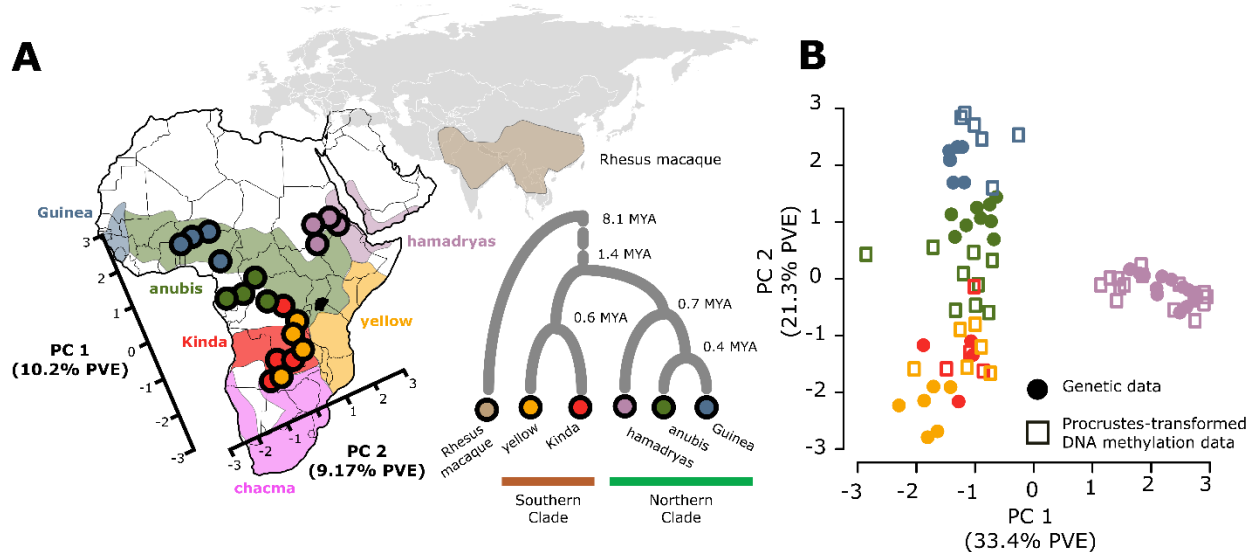

169

170 **Figure 1. Geographic and genetic structure in baboon DNA methylation patterns.** (A) The first two  
171 principal components from a PCA of baboon DNA methylation profiles (subsampled to n=4 individuals  
172 per species) projected onto the geographic distribution of baboon species in Africa. Northern clade (cool  
173 colors) and southern clade (warm colors) baboons separate along the first PC. Distribution of the six  
174 commonly recognized baboon allotaxa in Africa and the Arabian peninsula is based on Zinner, et al.  
175 (2013) and modified from a map created by Kenneth Chiou (CC BY 3.0 license); note that points reflect  
176 coordinates for DNA methylation data in PC space, not sampling location. Phylogenetic relationships  
177 between the five species included in this data set, with rhesus macaque as an outgroup, are shown in the  
178 inset (divergence dates within baboons from Rogers, et al. (*in review*) and between baboons and  
179 macaques from Perelman et al. (2011)). (B) Procrustes transformation of PCs 1 and 2 of the DNA  
180 methylation data (empty squares) conforms with PCs 1 and 2 of genotype data (solid circles) from the  
181 same samples (Procrustes  $t_0 = 0.89$ ,  $p < 10^{-6}$ ). PVE values on the x and y axis are provided for the  
182 genotype data.

183

184 Consistent with a close link between DNA methylation and genetic divergence, pairwise  
185 genetic covariance between samples strongly predicted pairwise covariance in DNA methylation  
186 levels. Across all CpG sites, a sample-wise covariance matrix based on RRBS-derived genotype  
187 data was significantly correlated with a sample-wise covariance matrix based on DNA  
188 methylation levels ( $n=756,262$  CpG sites; Mantel test  $r$  [95% CI] = 0.680 [0.651-0.721],  $p < 10^{-6}$ ),  
189 especially when considering the baboon samples alone ( $r = 0.818$  [0.794-0.856],  $p < 10^{-6}$ ).  
190 However, the strength of the correlation varied systematically across genomic contexts  
191 (Supplementary Methods). DNA methylation variation among baboons exhibited the lowest  
192 correlation with genetic variation in CpG islands ( $r = 0.497$  [0.449-0.554]), gene exons ( $r =$   
193  $0.594$  [0.548-0.688]), and gene promoters ( $r = 0.602$  [0.563-0.652]), and the highest correlation  
194 in regions of the genome that are functionally unannotated in *Papio* ( $r = 0.827$  [0.801-0.880]) (all  
195  $p < 10^{-6}$ ). Gene introns, untranslated regions (UTRs), CpG shores, and enhancers fell between  
196 these extremes (Fig. 2A). Further, in all contexts, the strongest relationship between genetic  
197 variation and DNA methylation levels was observed for intermediately methylated CpG sites,  
198 which were also the most variable (Fig. 2A). Notably, regions of the genome that support a non-  
199 consensus phylogeny (i.e., those most likely to be affected by incomplete lineage sorting or  
200 admixture, which is common in baboons: Zinner, et al. 2009; Zinner, et al. 2013; Tung and  
201 Barreiro 2017; Rogers, et al. *in review*; see Methods) exhibited a weaker association between the  
202 DNA methylation and genotype matrices than those that fit the consensus phylogeny (Mantel test  
203  $r = 0.716$  [0.649-0.760],  $n = 211,852$  sites compared to 0.815 [0.766-0.858] for regions that  
204 matched the consensus phylogeny,  $n = 542,509$  sites).

205 Both the PCA results and the correlation between DNA methylation and genetic structure  
206 thus suggest that species differences in DNA methylation are largely explained by genetic  
207 divergence. To investigate how this relationship scales, we estimated the correlation between  
208 divergence time (0.380 – 1.4 million years within *Papio*, and 8.1 million years between baboons  
209 and macaques: Perelman, et al. 2011; Rogers, et al. *in review*) and DNA methylation divergence  
210 per site. For this analysis, we limited the data set to CpG sites that were measured in at least 3  
211 individuals of each species ( $n=438,713$  CpG sites). When both macaques and baboons were  
212 included in the analysis, pairwise divergence time was strongly positively correlated with  
213 pairwise DNA methylation divergence (Mantel test  $r = 0.970$ ,  $p = 0.011$ ), with an estimated rate



214 of change for the average CpG site of 1.14% per million years. This estimate is similar to that  
215 obtained from baboons alone (1.27% per million years), although the baboon results are noisier  
216 and not statistically significant (Mantel test  $r = 0.377$ ,  $p = 0.067$ ). Divergence in DNA  
217 methylation is fastest in functionally unannotated regions of the genome and slowest in gene  
218 exons, CpG islands, promoters, and enhancers (Fig. 2B). This pattern is observable whether or  
219 not rhesus macaques are included and holds across mean methylation levels, although  
220 differences in rate are smaller for sites that are intermediately methylated (Fig. S3).  
221

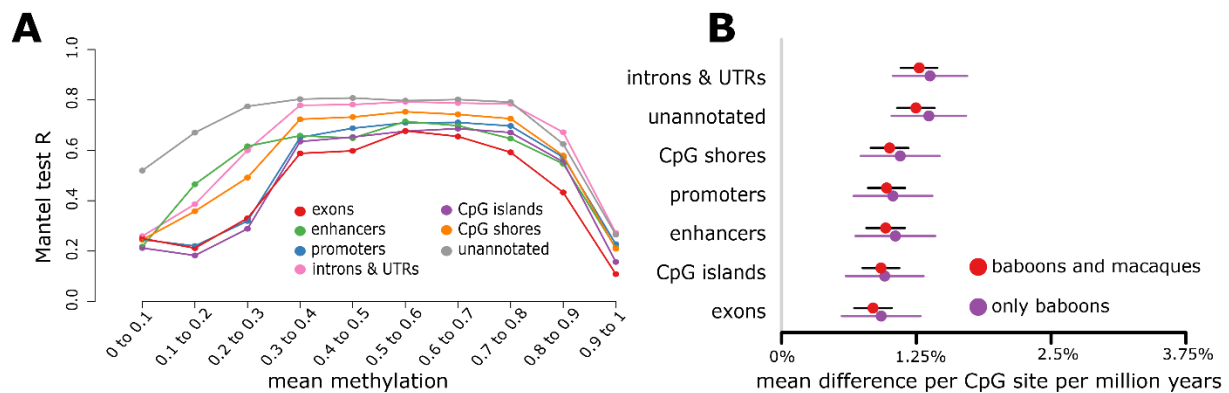

222  
223 **Figure 2. Concordance between DNA methylation variation and genetic variation depends on**  
224 **genomic context. (A)** Correlation between pairwise genetic covariance between species and pairwise  
225 covariance in DNA methylation levels, for CpG sites stratified by genomic context and mean DNA  
226 methylation level. Each point represents  $n=2,658-604,775$  CpG sites. **(B)** Estimated mean rate of change  
227 in DNA methylation levels per million years, stratified by genomic context. Error bars represent the  
228 standard error for each estimate.  
229

### 230 *Evolutionary shifts in DNA methylation levels within Papio*

231 We next investigated the frequency and distribution of CpG sites that exhibit (i) genus-  
232 level differences in DNA methylation between baboons and macaques; (ii) clade-level  
233 differences in DNA methylation between northern and southern clade baboons; and/or (iii)  
234 species-level shifts in DNA methylation levels that differentiate one baboon species from all  
235 other baboons. To do so, we first used ANOVA to identify 182,168 (25.2% of those tested),  
236 18,009 (2.5%), and 33,674 (4.7%) CpG sites for which genus, clade (within genus), or species  
237 (within clade) membership explained significant variance in DNA methylation levels,  
238 respectively (Fig. 3A; 10% FDR: Storey and Tibshirani 2003). These sets of taxonomically  
239 structured CpG sites overlapped more than expected by chance (Fisher's Exact Test  $\log_2(\text{OR}) >$   
240  $0.75$  and  $p < 10^{-16}$  for all three pairwise comparisons). CpG sites located in functionally

241 unannotated regions, gene introns, and untranslated regions (UTRs) were more likely to exhibit  
242 taxonomically structured variation in DNA methylation than CpG sites in other genomic contexts  
243 (Fig. 3B; Table S2). Conversely, such variation was depleted for CpG sites in gene exons. This  
244 dependency on genomic context was generally consistent between sites that exhibited significant  
245 genus, clade, or species-level variation. However, species-level changes were more strongly  
246 enriched in unannotated regions and more clearly depleted for other functional contexts (Fig. S4;  
247 Table S3), consistent with faster divergence in regions where genetic variation is more likely to  
248 be selectively neutral.

249 To identify shifts in DNA methylation associated with specific baboon taxa, we focused  
250 on the set of 46,260 sites that were taxonomically structured by clade or species membership.  
251 For these sites, we then applied a binomial mixed effects model (Lea, et al. 2015) to identify  
252 differential methylation (i) between each target species and all other baboons, and (ii) between  
253 clades (10% FDR threshold). We required a minimum 10% difference in mean DNA methylation  
254 levels between the focal species and all other baboon species to call a species-specific shift, and  
255 a minimum 10% difference between all between-clade species pairs, as well as rhesus macaque,  
256 to call a clade-level shift. Based on these criteria, we identified 2,959 – 11,189 species-specific  
257 shifts per species (29,001 unique sites in all). The number of shifts per species was not a function  
258 of sample size or independent evolutionary time (linear model,  $p = 0.809$  and  $p = 0.743$ ,  
259 respectively). We identified another set of 9,803 CpG sites with evidence for a clade-specific  
260 shift: 2,843 sites where DNA methylation in the northern clade was different from the southern  
261 clade species and macaques, 5,340 sites where DNA methylation in the southern clade was  
262 different from the northern clade species and macaques, and 1,640 sites where methylation  
263 differed between the two clades and both clades were also different from macaques.

264 To assess the biological significance of these shifts, we again investigated their  
265 distribution across the genome. Relative to the set of 46,260 sites tested, both species- and clade-  
266 specific shifts in DNA methylation were depleted in unannotated regions (species:  $\log_2(\text{OR}) = -$   
267  $0.057$ ,  $p=0.037$ ; clade:  $\log_2(\text{OR}) = -0.139$ ,  $p = 2.70 \times 10^{-5}$ ), suggesting that species- or clade-  
268 specific changes are less likely to be neutral than the overall set of taxonomically structured sites.  
269 Differentially methylated regions (DMRs, defined as clusters of  $\geq 3$  species- or clade-specific  
270 sites within a 2 kb window: see Supplementary Methods) were associated with RNA processing  
271 and metabolism-related genes in anubis, hamadryas, and yellow baboons, protein targeting in

272 shifts specific to the southern clade, and cell size and organization in shifts specific to the  
 273 northern clade (10% FDR threshold). We also identified 11 large DMRs ( $\geq 20$  CpG sites: Fig.  
 274 3C-D). Six of these DMRs occur in the hamadryas lineage, four in the Guinea lineage, and one is  
 275 specific to all southern clade baboons. All of the large DMRs overlapped with a CpG island and  
 276 almost all (9 of 11) were within 10 kb of the nearest gene. Large DMR-associated genes included  
 277 *single immunoglobulin domain-containing IL1R-related protein (SIGIRR)*, which is involved in  
 278 innate immune defense, regulation of inflammation, and natural killer cell maturation; *taperin*  
 279 (*TPRN*), which is implicated in hearing and sensory phenotypes; and *transmembrane protein 203*  
 280 (*TMEM203*), which is required for spermatogenesis. These loci represent candidate regions in  
 281 which differences in DNA methylation may be important in translating genetic variation to  
 282 phenotypic differences between baboon taxa.  
 283

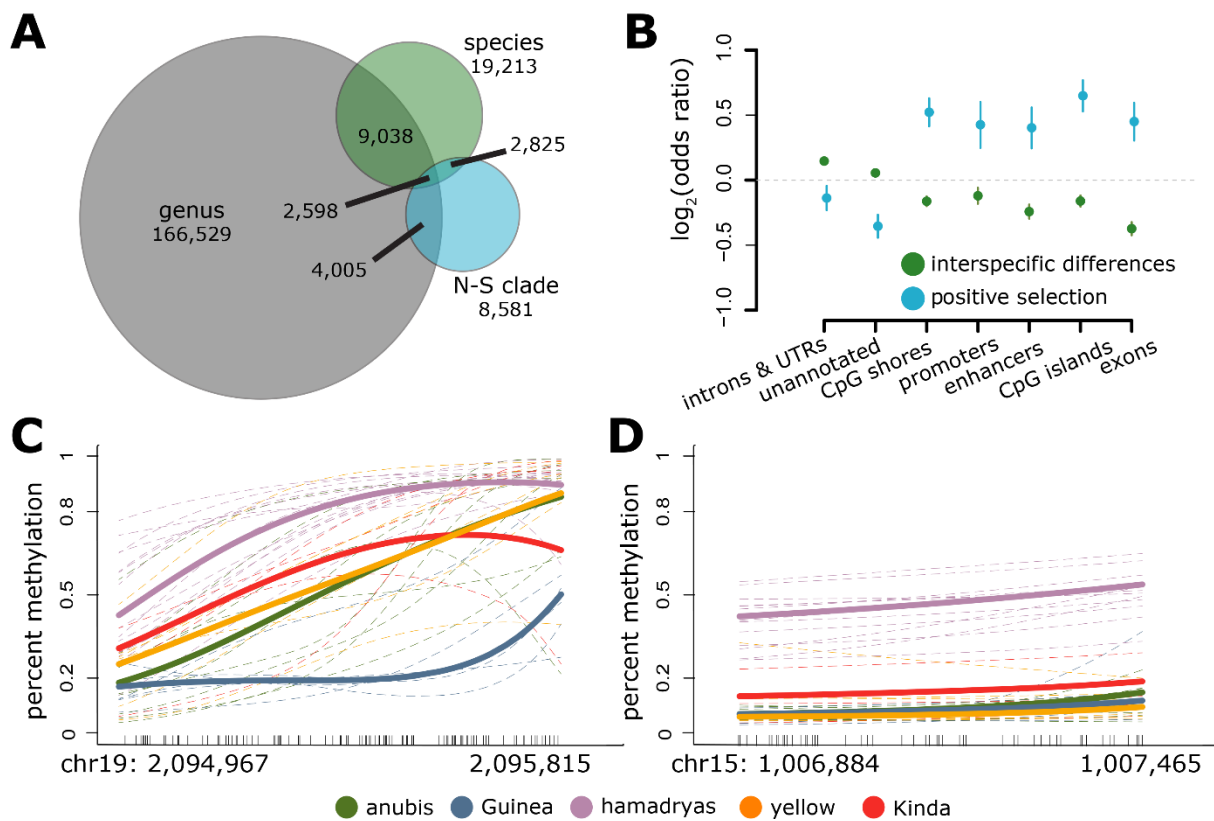

284

285 **Figure 3. Interspecific differences in DNA methylation levels.** (A) The number of CpG sites that  
 286 exhibit significant taxonomic structure at successive levels of the phylogeny. Sites significantly overlap  
 287 between genus and N-S clade ( $\log_2(\text{OR}) = 0.887$ ,  $p < 1.28 \times 10^{-42}$ ), genus and species ( $\log_2(\text{OR}) = 0.768$ ,  $p$   
 288  $< 2.92 \times 10^{-31}$ ), and N-S clade and species ( $\log_2(\text{OR}) = 3.433$ ,  $p < 1.45 \times 10^{-295}$ ). (B) Enrichment by genomic  
 289 context for (i) CpG sites in which DNA methylation levels show significant taxonomic structure by clade  
 290 or species (green dots; background set is the full set of  $n=756,262$  CpG sites analyzed), and (ii) CpG sites

291 in which Ornstein-Uhlenbeck models and heuristic analyses both indicate a likely history of positive  
292 selection (blue dots: background set is n=46,260 taxonomically structured CpG sites). Functional  
293 elements that are depleted for significant taxonomic structure overall are nevertheless enriched for a  
294 signature of selection among those sites that do exhibit taxonomic structure. **(C)** and **(D)** Example large  
295 differentially methylated regions (DMRs). Dashes along the x-axis show the location of each measured  
296 CpG site in the region and lines show the smoothed mean DNA methylation level (BSmooth: Hansen, et  
297 al. 2012). Thin dashed lines represent individual samples, and bold lines represent mean methylation  
298 levels per species. A Guinea baboon-specific DMR associated with the *Leucine Rich Repeat and Ig*  
299 *Domain Containing 3 (LINGO3)* gene is shown in **(C)** and a hamadryas baboon-specific DMR associated  
300 with the *taperin (TPRN)* and *transmembrane protein 203 (TMEM203)* genes is shown in **(D)**.  
301

### 302 ***Selection on DNA methylation patterns in baboons***

303 Our results indicate that DNA methylation in functionally important regions of the  
304 genome evolves more slowly than DNA methylation in unannotated regions, consistent with  
305 stabilizing selection on gene regulation and neutral evolution for functionally silent CpG sites.  
306 However, lineage-specific shifts in DNA methylation also point to a possible contribution of  
307 positive selection. To investigate the relative contribution of these different selective regimes, we  
308 performed site-specific analyses using two complementary methods: (i) a heuristic approach  
309 based on comparisons between intra- and interspecific variation (Rifkin, et al. 2003; Nuzhdin, et  
310 al. 2004; Gilad, et al. 2006a; Whitehead and Crawford 2006; Gallego Romero, et al. 2012), and  
311 (ii) Ornstein-Uhlenbeck models of phenotypic evolution, which have recently been extended to  
312 model gene expression phenotypes and to incorporate intraspecific variation (Lande 1976; Butler  
313 and King 2004; Bedford and Hartl 2009; Rohlf and Nielsen 2014).

314 The heuristic approach is based on the logic that phenotypes that evolve under positive  
315 selection will harbor less intraspecific variation than phenotypes that evolve under genetic drift,  
316 (Gallego Romero, et al. 2012). Therefore, CpG sites where mean methylation differs between  
317 species but variation is low within species are the most likely to have experienced a history of  
318 positive selection. To identify such sites, we focused on those in the lowest decile of within-  
319 species variance (controlling for average methylation, see Methods) that also displayed  
320 significant species or clade-specific methylation. These criteria yielded a set of 1,178 and 4,399  
321 CpG sites that are candidates for positive selection to differentiate baboon clades or species,  
322 respectively. We note that this approach is likely to retain false positives (and also miss false  
323 negatives, which is common in tests for selection): thus, this set should be treated as enriched for  
324 a likely history of positive selection, rather than as a definitive list of positively selected sites.

325 In the second approach, we fit Brownian motion and Ornstein-Uhlenbeck models of  
326 phenotypic evolution, which include explicit parameters for the strength of selection towards a  
327 phenotypic optimum or optima (Butler and King 2004). We used a modified approach that takes  
328 into account intraspecific phenotypic variance (following Bedford and Hartl 2009; Rohlf and  
329 Nielsen 2014), with modifications to accommodate our data type. Simulations indicated that, in  
330 the baboon phylogeny, these models are underpowered to identify species-specific episodes of  
331 selection, but are reasonably well-powered to detect positive selection on multi-species lineages  
332 (see Supplementary Methods). However, like the heuristic approach, we treat our results as  
333 enriched for specific evolutionary histories, as opposed to definitive. For each taxonomically  
334 structured site (n=46,260 sites), we fit five models, which captured (i) genetic drift across the  
335 baboon phylogeny; (ii) stabilizing selection towards a single optimum; (iii) positive selection  
336 towards a different phenotypic optimum in the southern baboon clade (yellow and Kinda); (iv)  
337 positive selection towards a different phenotypic optimum in the northern baboon clade (anubis,  
338 Guinea, and hamadryas); and (v) positive selection towards a different phenotypic optimum in a  
339 northern baboon subclade, the anubis-Guinea lineage. We defined the best model (for each site)  
340 as the one with the lowest Akaike Information Criterion value (AIC: Akaike 1974). Models iii-v,  
341 which include positive selection somewhere in the tree, were chosen as the best model for 20,329  
342 CpG sites (2.7% of the initial set of sites tested, n=756,262, and 43.9% of the 46,260 sites that  
343 exhibited significant clade- or species-level shifts).

344 The heuristic approach and the OU model approach produced highly overlapping sets of  
345 putative positively selected sites (Fisher's Exact Test  $\log_2(\text{OR}) = 2.26$ ,  $p = 8.99 \times 10^{-118}$ ). We  
346 detected 987 CpG sites with evidence for positive clade-level selection in both methods  
347 (Supplementary Methods), which we treat as our highest-confidence set. Compared to the  
348 background set of sites with clade- or species-level shifts in DNA methylation, which tend to  
349 occur most often in functionally unannotated regions, this set is strongly enriched for gene exons  
350 and functional regulatory elements, including promoters, enhancers, CpG islands, and CpG  
351 island shores (Fig. 3B; Table S2). This pattern is consistent for all sets of candidate positively  
352 selected sites (Fig. S4; Table S4). 129 DMRs were associated with species-specific selection (4-  
353 46 per species) and 39 with clade-specific selection (16 assigned to the northern clade and 23  
354 assigned to the southern clade), and consistent with our results for species-specific shifts above,

355 candidate positively selected DMRs were enriched overall for association with genes involved in  
356 metabolic processes (10% FDR threshold).

357 If regulatory divergence in DNA methylation levels is a consequence of genetic  
358 divergence, the genetic sequence surrounding positively selected CpG sites should also show  
359 signatures of positive selection, including reduced levels of local genetic variation. To test this  
360 prediction, we calculated nucleotide diversity ( $\pi$ : Nei and Li 1979) for the 1 kb centered on each  
361 taxonomically structured CpG site for each baboon species, based on data from the Baboon  
362 Genome Project Diversity Panel (2 – 4 individuals sequenced at 30x coverage per species; see  
363 Supplementary Methods). Averaged across all baboon lineages, nucleotide diversity around CpG  
364 sites for which we inferred a history of positive selection somewhere in the tree (mean  $\pi \pm$  s.d =  
365  $0.00239 \pm 0.00261$ ) did not differ from nucleotide diversity around CpG sites with no evidence  
366 for positive selection ( $0.00241 \pm 0.00221$ , Tukey's HSD  $p = 0.923$ ; Fig. 4). However, nucleotide  
367 diversity was significantly lower for site-lineage combinations in which positive selection was  
368 specifically inferred than for either other lineages at the same site ( $0.00213 \pm 0.00348$  versus  
369  $0.00251 \pm 0.00273$ ,  $p = 3.86 \times 10^{-12}$ ) or near sites with no evidence for positive selection  
370 ( $0.00213 \pm 0.00348$  versus  $0.00241 \pm 0.0022$ ,  $p = 1.22 \times 10^{-12}$ ). For “nonselected” lineages, local  
371 nucleotide diversity did not differ from nucleotide diversity at sites with no evidence for positive  
372 selection ( $p = 0.096$ ).

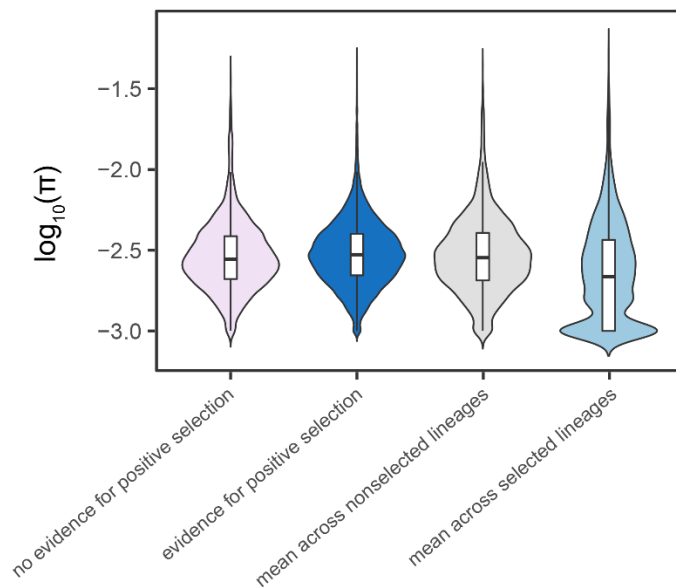

373

374 **Figure 4. Nucleotide diversity near CpG sites is lower in lineages where positive selection has been**  
375 **inferred.**  $\text{Log}_{10}(\pi)$  for the 1 kb window surrounding CpG sites where DNA methylation levels are  
376 taxonomically structured, and (i) we inferred no evidence for positive selection (pink:  $n=40,212$  sites) or

377 (ii) where positive selection was inferred on any baboon lineage (dark blue: n=4,901 sites, based on the  
378 intersection set of the heuristic and OU approaches for multi-species lineages and results from the  
379 heuristic approach for single lineages).  $\text{Log}_{10}(\pi)$  for sites in dark blue are replotted in gray for lineages  
380 unaffected by putative positive selection and in light blue for lineages putatively affected by positive  
381 selection. Lineage-site combinations linked to positive selection (light blue) exhibit lower local nucleotide  
382 diversity than all other classes (Tukey's HSD:  $p = 1.22 \times 10^{-12}$  compared to sites with no evidence of  
383 positive selection [pink];  $p = 7.26 \times 10^{-7}$  against the same sites, but with  $\pi$  averaged across all lineages  
384 [dark blue];  $p = 3.86 \times 10^{-12}$  against the same sites, but with  $\pi$  averaged across nonselected lineages only  
385 [gray]).  $\pi$  was calculated separately for each species and averaged across lineages, and is log transformed  
386 here for visualization purposes only. Box plots show median (black bar) and interquartile range  
387 (whiskers).

388

## 389 Discussion

390 Together, our findings provide novel insight into the rate and determinants of DNA  
391 methylation divergence in primates. In contrast to comparative studies of human populations  
392 (Fraser, et al. 2012; Heyn, et al. 2013; Carja, et al. 2017), but like studies across the more deeply  
393 diverged great apes (Hernando-Herraez, et al. 2013; Hernando-Herraez, et al. 2015), global  
394 divergence in DNA methylation patterns in baboons is clearly apparent, even among species that  
395 diverged relatively recently (e.g., anubis and Guinea baboons: diverged ~0.38 mya). Roughly  
396 speaking, our results suggest that primate taxa can become clearly distinguishable based on DNA  
397 methylation data after approximately 35,000 generations (assuming a generation time for  
398 baboons of 11 years: Swedell 2011; Rogers, et al. *in review*), although this rate varies by  
399 genomic context. Notably, although yellow baboons and Kinda baboons diverged earlier than  
400 anubis and Guinea baboons (~0.6 mya, closer to when hamadryas baboons diverged from the  
401 anubis-Guinea lineage), global patterns of DNA methylation separate these two southern clade  
402 species less clearly than any of the northern clade species. This difference may reflect recent  
403 admixture in the southern part of the yellow baboon range (Zinner, et al. 2009; Keller, et al.  
404 2010), or smaller long term effective population sizes in the northern clade species (Rogers, et al.  
405 *in review*). Among the northern clade species, anubis baboons fall closest to southern clade  
406 baboons, which may also be a consequence of hybridization: anubis baboons and yellow baboons  
407 hybridize in Kenya today, and have likely done so in the past as well (Alberts and Altmann 2001;  
408 Charpentier, et al. 2012; Wall, et al. 2016; Rogers, et al. *in review*).

409 Our results are in line with emerging evidence that, in comparisons involving clearly  
410 divergent lineages, variation in DNA methylation levels is largely tied to variation in nearby  
411 genetic sequence (Hernando-Herraez, et al. 2013; Hernando-Herraez, et al. 2015). Specifically,

412 DNA methylation patterns in baboons recapitulate phylogenetic structure, and local genomic  
413 context predicts both the rate at which DNA methylation evolves and the probability of a past  
414 history of selection. These observations are consistent with analyses in great apes, which  
415 revealed that interspecific differences in DNA methylation tend to occur at loci that also contain  
416 high levels of species-specific mutations (Hernando-Herraez, et al. 2015). Similarly, in  
417 *Arabidopsis* lines, inter-accession differences can largely be explained by *cis*-acting methylation  
418 quantitative trait loci (meQTL) (Dubin, et al. 2015). Thus, while environmental variation may be  
419 important for explaining variation in DNA methylation within populations (Jirtle and Skinner  
420 2007; Feil and Fraga 2012), including baboons (Lea, et al. 2016), genetic effects are likely to  
421 dominate in between-population and between-species comparisons. Indeed, in our data set,  
422 hamadryas baboon and anubis baboon samples were obtained from multiple populations,  
423 representing both captive and natural settings. However, despite exposure to different diets and  
424 housing conditions, population differences explained very little variance in the overall data set  
425 (Supplementary Methods).

426 Our data set also facilitates initial comparisons of DNA methylation evolution against  
427 gene expression data sets. Although our findings resemble those of cross-species gene expression  
428 analyses in that they globally reproduce the species phylogeny, they also suggest that the  
429 evolution of DNA methylation is less constrained on average. While CpG sites are enriched in  
430 gene bodies, promoters, and CpG islands, the majority of CpG sites in primate genomes fall in  
431 functionally unannotated regions. Our analyses show that DNA methylation levels in  
432 unannotated regions are both faster evolving, and, compared to all rapidly evolving sites,  
433 underrepresented for signatures of positive selection (Fig. 3B). Thus, while several lines of  
434 evidence indicate that gene expression levels for most genes are constrained by stabilizing  
435 selection, the same pattern probably does not hold for most CpG sites. This difference may  
436 explain why the evolution of DNA methylation levels looks more clock-like than for gene  
437 expression (Carja, et al. 2017), a pattern now observed in human populations, *Arabidopsis*  
438 accessions, and here, in baboons (Becker, et al. 2011; Schmitz, et al. 2011; van der Graaf, et al.  
439 2015; Carja, et al. 2017). It also is consistent with experimental studies showing that DNA  
440 methylation levels influence gene regulation at only a subset of CpG sites (Maeder, et al. 2013;  
441 Ford, et al. 2017; Lea, et al. 2017b).



442           Nevertheless, we do find support for positive selection on DNA methylation levels for a  
443 small fraction of the CpG sites we profiled. Tests for selection on phenotypic variation have  
444 important limitations (e.g., unknown mutational variance, the assumption of relatively simple  
445 evolutionary scenarios: Butler and King 2004; Gilad, et al. 2006b; Rohlf and Nielsen 2014).  
446 However, they are still likely to enrich for true cases of positive selection (Blekhman, et al. 2008;  
447 Rohlf and Nielsen 2014). Here, the strong enrichment of putatively selected sites within genes  
448 and gene regulatory elements, the overlap between two different methods for identifying selected  
449 sites, and the identification of coherent DMRs associated with candidate selected sites all  
450 indicate that we have captured a set of CpG sites of interest for baboon evolutionary history.  
451 Additionally, we identified a loss of local nucleotide diversity—a purely DNA sequence-based  
452 analysis—specifically near sites and in lineages inferred to be affected by positive selection, in  
453 an analysis based only on DNA methylation phenotypes.

454           Recent evidence shows that changes in DNA methylation can play an important role in  
455 phenotypic evolution. For example, loss of sight in cave-dwelling tetra fish (*Astyanax*  
456 *mexicanus*) is mediated by DNA methylation-mediated repression of genes involved in eye  
457 development (Gore, et al. 2018). Our results suggest that comparative studies of DNA  
458 methylation in recent radiations can help identify other loci of interest, and could potentially be  
459 combined with outlier scans based on other types of data (e.g., Bergey, et al. 2016). Notably, in  
460 baboons, we found several large DMRs linked to genes involved in immunity, sensory  
461 perception, and spermatogenesis, three categories previously identified in sequence-based scans  
462 for selection in primates (Kosiol, et al. 2008). These examples suggest that, at least in some  
463 instances, natural selection on gene regulation has been directed towards changes in DNA  
464 methylation phenotypes. If so, variation in DNA methylation at candidate selected sites should  
465 functionally affect gene expression, a prediction that can now be empirically tested using  
466 reporter assays or epigenomic editing approaches (Liu, et al. 2016; Lea, et al. 2017b). We  
467 anticipate that such a combination of comparative, genetic, and experimental approaches will  
468 help resolve the much-debated role of epigenetic marks in adaptive evolution (Laland, et al.  
469 2014; Verhoeven, et al. 2016).

470

## 471 **Methods**

### 472 ***RRBS data generation, processing, and quality control***

473 DNA methylation data were generated for 39 baboons across five of the six recognized  
474 extant species (9 anubis, 6 yellow, 14 hamadryas, 6 Guinea, and 4 Kinda baboons; Table S1).  
475 We also generated RRBS data for 5 rhesus macaques as an outgroup. For *P. anubis* samples from  
476 the Washington National Primate Research Center (WaNPRC), *P. papio* from the Brookfield  
477 Zoo, and *P. hamadryas* from the North Carolina Zoo, we extracted genomic DNA using the  
478 QIAGEN DNeasy Blood & Tissue Kit, following the manufacturer's recommendations. Other  
479 samples were obtained as previously extracted DNA (see Table S1). All DNA samples were  
480 extracted from whole blood with the exception of 2 *P. cynocephalus*, 1 *P. anubis*, 2 *P. kindae*,  
481 and 1 *P. hamadryas* for whom samples were obtained from banked white blood cells.  
482 Differences in source tissue (whole blood versus banked white blood cells) do not contribute to  
483 any of the first 10 principal components of variation in DNA methylation within this sample (t-  
484 test, all p-values > 0.20). Differences in cell type composition also appear unlikely to drive  
485 species-specific methylation levels (Supplementary Methods).

486 RRBS libraries for each sample were prepared following Boyle et al. (2012). Briefly,  
487 Illumina TruSeq barcoded libraries were constructed using 180 ng of genomic DNA per sample.  
488 Libraries were pooled together in sets of 10-12 samples, subjected to sodium bisulfite conversion  
489 using the EpiTect Bisulfite Conversion kit (QIAGEN), and then PCR amplified for 16 cycles  
490 prior to sequencing on the Illumina HiSeq 2500 platform. Each pooled set of libraries was  
491 sequenced in a single lane to 17.2 million reads per sample (s.d. = 12.8 million reads: Table S1).  
492 To assess the efficiency of the bisulfite conversion, 1 ng of unmethylated lambda phage DNA  
493 (Sigma Aldrich) was added to each sample prior to library construction.

494 Sequences were trimmed for adapter contamination, RRBS end repair, and base quality  
495 using Trim Galore! (Babraham Bioinformatics) before being mapped to the anubis baboon  
496 reference genome (*Panu2.0*) using BSMAP (Xi and Li 2009). We removed sites that overlapped  
497 genetic variants in which one allele abolishes a CpG site found in the reference genome.  
498 Combined with BSMAP's three-nucleotide mapping option, this step eliminates most  
499 heterospecific mapping biases within *Papio* (Supplementary Methods and Fig. S5). The DNA  
500 methylation level at each CpG site was calculated as the proportion of reads with unconverted  
501 (i.e. methylated) cytosine bases to total reads covering that site. Based on reads mapped to the  
502 lambda phage genome, all samples had a bisulfite conversion efficiency greater than 98.5%, with

503 no significant contribution of species identity to variance in conversion efficiency (ANOVA  $F =$   
504 1.303,  $p = 0.27$ ; Table S1).

505 After excluding sites for which data were missing for  $\geq 50\%$  of our study subjects or for  
506 which mean coverage was  $< 5x$ , we retained 2,450,153 CpG sites for downstream analysis. As  
507 expected for RRBS data sets, these sites were enriched in functionally important regions of the  
508 genome and displayed typical mammalian patterns of CpG DNA methylation (Fig. S1). To focus  
509 on the sites most likely to exhibit biologically meaningful variation, we further excluded  
510 constitutively hypermethylated (mean DNA methylation level  $> 0.90$ ) and constitutively  
511 hypomethylated (mean DNA methylation level  $< 0.10$ ) sites and those that were near-invariant  
512 (s.d.  $< 0.05$ ), resulting in a final analysis set of 756,262 CpG sites.

513 Where possible, we modeled DNA methylation levels as count data (the number of  
514 methylated reads and total reads for each site), which retains information about the uncertainty in  
515 each estimate due to variation in read coverage (Dolzhenko and Smith 2014; Sun, et al. 2014;  
516 Lea, et al. 2015; Lea, et al. 2017a). However, because some of our analyses (e.g., PCA, Ornstein-  
517 Uhlenbeck models) required continuous data, we also estimated DNA methylation levels as the  
518 ratio of methylated reads to total reads within each individual for each CpG site. Because  
519 variation in sequencing coverage can systematically bias DNA methylation estimates, for these  
520 analyses we used the residuals of the raw ratios after regressing out site-specific total read  
521 coverage for each individual.

522

### 523 ***Functional element annotations and enrichment analysis***

524 We used gene body and CpG island annotations for *Panu2.0* obtained from Ensembl  
525 (Cunningham et al. 2015) and the UCSC Genome Browser (Karolchik et al. 2014), respectively.  
526 Gene promoters were defined as the 2 kb region upstream of the 5'-most annotated gene  
527 transcription start site (following Deng et al. 2009; Shulha et al. 2013; Lea et al. 2015) and CpG  
528 island shores were defined as the 2 kb regions flanking either side of a CpG island (Irizarry, et al.  
529 2009). Because baboon enhancer annotations are not available, we defined putative baboon  
530 enhancers by projecting coordinates from ENCODE H3K4me1 ChIP-seq of human peripheral  
531 blood mononuclear cells (Dunham et al. 2012) onto the *Panu2.0* genome using the UCSC  
532 Genome Browser *liftover* tool (Hinrichs et al. 2006).

533 Gene ontology (GO) enrichment analyses were performed using the Cytoscape module  
534 ClueGO (Bindea, et al. 2009). To link differentially methylated sites to genes, we first identified  
535 clusters of CpG sites with similar patterns of differential methylation (differentially methylated  
536 regions or DMRs). We called DMRs when  $\geq 3$  CpG sites within a 2 kb window exhibited the  
537 same type of lineage-specific change (e.g., hypo-methylation in hamadryas baboons), and  
538 bounded the DMR by the first and last CpG site that exhibited lineage-specific methylation. We  
539 then collapsed overlapping DMRs. We assigned a DMR to a gene when a CpG site within the  
540 DMR fell within 10 kb of the gene body. To test for gene set enrichment, we analyzed GO  
541 Biological Processes that fell between levels 3 and 8 of the GO tree, included at least 4 genes in  
542 our data set, and for which at least 5% of genes assigned to the term were present in the test set.  
543 We also collapsed GO parent-child terms with at least 50% overlap. Enrichment analyses were  
544 corrected for multiple hypothesis testing using the Benjamini-Hochberg (B-H) method  
545 (Benjamini and Hochberg 1995). Gene set enrichment analyses for DNA methylation data can be  
546 biased if some gene sets are systematically associated with larger numbers of CpG sites than  
547 others (Geeleher, et al. 2013). However, in our data set, genes associated with differentially  
548 methylated sites were not associated with more tested sites than other genes (logistic regression:  
549  $z = 0.054$ ,  $p = 0.957$ ).

550

### 551 *Covariance between genetic structure and DNA methylation patterns*

552 To assess the relationship between phylogenetic structure and DNA methylation patterns  
553 in our data set, we conducted principal components analysis in R (version 3.2.5; R Core Team  
554 2016) on the scaled variance-covariance matrix of the DNA methylation level data. We ran the  
555 PCA both including and excluding the rhesus macaque samples, and in baboons after  
556 subsampling to the same number of individuals per species ( $n=4$ ; Fig. 1A, 1B, and S2).

557 To test the correlation between DNA methylation levels and pairwise genetic distance  
558 between samples, we used Mantel tests. We called genotypes from RRBS data for 49,607  
559 biallelic SNPs (see Supplementary Methods) and calculated the pairwise genetic covariance. We  
560 then compared a genotype-based covariance matrix to the pairwise covariance of DNA  
561 methylation profiles using the R package *vegan* (Oksanen et al. 2016), stratified by both  
562 functional compartment (gene, enhancer, CpG island, CpG shore, promoter, unannotated) and  
563 mean methylation level (Fig 2A). We also tested whether windows of the genome where genetic

564 structure followed an alternate phylogeny (a consequence of incomplete lineage sorting or  
565 admixture) exhibited a lower correlation between genetic and DNA methylation covariance (see  
566 Supplementary Methods).

567 Finally, to investigate the relationship between DNA methylation divergence and genetic  
568 divergence between species, we retained CpG sites for which each species was represented by at  
569 least three individuals and a total (across individuals) of at least 10 reads ( $n = 438,713$  CpG  
570 sites). We calculated the mean DNA methylation level per species for each retained CpG site and  
571 the difference in mean methylation between each species pair. We then tested whether  
572 divergence time (based on Rogers, et al. *in review* for baboons and Perelman, et al. 2011 for  
573 baboon-macaque) predicted the Euclidean distance between species using a Mantel test.

574

### 575 ***Lineage-specific changes in DNA methylation***

576 For sites in which clade or species significantly contributed to variance in DNA  
577 methylation levels ( $n=46,260$  taxonomically structured sites, identified using ANOVA and a  
578 10% FDR threshold), we tested for lineage-specific shifts using the beta-binomial model  
579 implemented in the program MACAU (Lea, et al. 2015). We tested each species for differences  
580 in DNA methylation level when compared to all other baboons and we also tested whether  
581 southern clade baboons had different methylation levels than northern clade baboons. For each  
582 comparison and CpG site, we considered the model:

$$583 \quad y_i = \text{Bin}(r_i, \pi_i) \quad (1)$$

584 where  $r_i$  is the total read count for  $i^{\text{th}}$  individual,  $y_i$  is the methylated read count for that  
585 individual, and  $\pi_i$  is an unknown parameter that represents the true methylation level for that  
586 individual at the site of interest. MACAU then uses a logit link to model  $\pi_i$  as a function of the  
587 predictor variable of interest (here, species or clade membership):

$$588 \quad \log\left(\frac{\pi_i}{1-\pi_i}\right) = x_i\beta + \mathbf{w}_i^T\boldsymbol{\alpha} + e_i \quad (2)$$

$$589 \quad \mathbf{e} = (e_1, \dots, e_n)^T \sim \text{MVN}(\mathbf{0}, \sigma^2\mathbf{I})$$

590 where  $\mathbf{w}_i$  is a vector of fixed effect covariates including an intercept and the sample-specific  
591 bisulfite conversion rate;  $\boldsymbol{\alpha}$  is a vector of coefficients for  $\mathbf{w}_i$ ;  $x_i$  represents species or clade  
592 membership coded as 1 (for the taxon of interest) or 0 (for any other taxa) and  $\beta$  is the coefficient  
593 for the effect of taxonomic membership;  $\mathbf{e}$  is an  $n$ -vector of independent residual error with

594 variance  $\sigma^2$ ; and  $I$  is a n-by-n identity matrix. We did not model genetic non-independence in this  
595 analysis; thus, the  $K$  matrix input to MACAU was an identity matrix.

596 In addition to a 10% FDR threshold (q-value: Storey & Tibshirani 2003), we required a  
597 minimum difference of 10% in mean methylation between either (i) the focal species compared  
598 to all other species, for species-level shifts, or (ii) for all pairwise comparisons between northern  
599 clade and southern clade species, for clade-level shifts. We assigned clade-level shifts to one of  
600 the two lineages based on post-hoc comparison to rhesus macaques. For example, we assigned a  
601 shift to the northern clade when there was a mean difference in DNA methylation of  $\geq 10\%$   
602 between northern clade baboons and macaques, but not between southern clade baboons and  
603 macaques.

604

### 605 *Identification of candidate directionally selected sites*

606 To test for positive selection using the heuristic approach, we first calculated the  
607 intraspecific variance for each of the 756,262 CpG sites in our primary data set, after mean-  
608 centering DNA methylation levels for each species. We then binned the CpG sites into 5%  
609 quantiles based on mean methylation level, and retained sites with intra-specific variance in the  
610 lowest 10% quantile for each bin. We intersected these low-variance sites with the set of sites  
611 that exhibited species- or clade-specific methylation, based on the criteria outlined for  
612 identifying taxonomic structure with ANOVA followed by beta-binomial regression. This  
613 intersection set is likely to be enriched for a history of positive selection.

614 As an alternative approach, we fit Ornstein-Uhlenbeck (OU) models of the evolutionary  
615 process, based on the phylogenetic tree for baboons (Rogers, et al. *in review*). In OU models,  
616 trait evolution is modeled as the sum of stochastic and deterministic forces, with parameters for  
617 the strength of selection, the strength of genetic drift, and the trait optimum. In addition, because  
618 these models assume phenotypes have a continuous distribution, we transformed DNA  
619 methylation levels using a logit link function. A basic OU model has the form:

$$620 \quad dx \sim \alpha(\theta - x) + \sigma W \quad (3)$$

621 where  $dx$  captures the continuous rate of change in the trait value  $x$ ,  $\alpha$  represents the pull towards  
622 the optimum trait value  $\theta$ ,  $\sigma$  is the rate of neutral drift, and  $W$  is distributed normally with  
623 variance corresponding to the amount of independent evolutionary time,  $dt$ . For multiple species  
624  $m$ , the OU process can be written as a multivariate normal distribution:

625 
$$X \sim MVN\left(\boldsymbol{\mu}, \frac{\sigma^2}{2\alpha} \boldsymbol{\Sigma}\right) \quad (4)$$

626 where  $\boldsymbol{\mu}$  is a  $m$ -by-1 vector of  $\theta_j$ , the optimum trait values for species  $j$ .  $\boldsymbol{\Sigma}$  captures the  
627 covariance between species and is determined by the phylogenetic covariance,  $\boldsymbol{\Sigma}_{phylo}$ , and  $\alpha$   
628 such that the covariance between species  $j$  and  $k$ ,  $\Sigma_{j,k}$ , is given by  $\exp\left(-2\alpha\left(1 - \Sigma_{phylo_{j,k}}\right)\right)$ . To  
629 incorporate intraspecific variance into the OU process, which increases the power to identify true  
630 instances of positive selection (Rohlf and Nielsen 2014), the vector  $\boldsymbol{\mu}$  is expanded to an  $n$ -by-1  
631 vector where each element,  $\theta_i$ , is equal to  $\theta_j$  for the species  $j$  to which individual  $i$  belongs. The  
632 covariance matrix  $\boldsymbol{\Sigma}$  is replaced by the  $n$ -by- $n$  covariance matrix between individuals, with a new  
633 parameter  $\tau^2$  added to the diagonal of the covariance matrix to take into account within-species  
634 variance.

635 Different evolutionary regimes correspond to different OU process parameter values.  
636 Values of  $\alpha$  at or near 0 correspond to genetic drift (no pull towards an optimum trait value),  
637 while non-zero values of  $\alpha$  indicate a history of selection. If  $\alpha > 0$  and  $\theta$  is constant across  
638 lineages, the trait has evolved under stabilizing selection. If  $\alpha > 0$  and  $\theta$  varies between  
639 lineages, the trait has evolved under directional (positive) selection on at least part of the  
640 phylogenetic tree. We therefore used AIC to compare five OU models for each CpG site in  
641 which species or clade membership significantly contributed to DNA methylation variation  
642 based on ANOVA (see Results: *Selection on DNA methylation patterns in baboons* and  
643 Supplementary Methods for simulation results on power to detect selective shifts).

644

## 645 **Acknowledgements**

646 We gratefully acknowledge Justin O’Riain, Laurel Serieys, Christian Roos, Julia Fischer,  
647 Dietmar Zinner, Jane Phillips-Conroy, Mark Wilson, and the North Carolina Zoo for  
648 contributing samples. We thank Amanda Lea for her assistance in generating and analyzing the  
649 DNA methylation data used in this study, Rori Rohlf for valuable aid in using OU models, and  
650 members of the Tung lab for helpful comments and discussion. The work reported in this paper  
651 also benefited from the activities and discussions within the Baboon Genome Analysis  
652 Consortium, for which the full list of participants is presented in Rogers, et al. (*in review*).  
653 Finally, we thank the Baylor College of Medicine Human Genome Sequencing Center for access  
654 to the baboon genome assembly (*Panu 2.0*). RRBS data are deposited in NCBI’s Short Read

655 Archive (GSE 4359166). Code for fitting OU models is available at  
656 <https://github.com/TaurVil/PapioMethylation>. This work was supported by the National Science  
657 Foundation (grant number BCS-1751783) to J.T. and T.P.V., the National Institutes of Health  
658 (R01-GM102526 to J.T. and P51-OD011132 in support of Yerkes National Primate Research  
659 Center), a pilot award from the National Center for Advancing Translational Sciences (grant  
660 number UL1TR001117), and high-performance computing resources supported by the North  
661 Carolina Biotechnology Center (grant number 2016-IDG-1013).

662

## 663 **References**

- 664 Abzhanov A, Protas M, Grant BR, Grant PR, Tabin CJ. 2004. Bmp4 and morphological variation of beaks  
665 in Darwin's finches. *Science* 305:1462-1465.
- 666 Akaike H. 1974. A new look at the statistical model identification. *IEEE transactions on automatic control*  
667 19:716-723.
- 668 Alberts SC, Altmann J. 2001. Immigration and hybridization patterns of yellow and anubis baboons in  
669 and around Amboseli, Kenya. *American journal of primatology* 53:139-154.
- 670 Banovich NE, Lan X, McVicker G, Van de Geijn B, Degner JF, Blischak JD, Roux J, Pritchard JK, Gilad Y.  
671 2014. Methylation QTLs are associated with coordinated changes in transcription factor binding,  
672 histone modifications, and gene expression levels. *PLoS Genetics* 10:e1004663.
- 673 Battle A, Mostafavi S, Zhu X, Potash JB, Weissman MM, McCormick C, Haudenschild CD, Beckman KB, Shi  
674 J, Mei R, et al. 2014. Characterizing the genetic basis of transcriptome diversity through RNA-  
675 sequencing of 922 individuals. *Genome Research* 24:14-24.
- 676 Becker C, Hagmann J, Müller J, Koenig D, Stegle O, Borgwardt K, Weigel D. 2011. Spontaneous epigenetic  
677 variation in the *Arabidopsis thaliana* methylome. *Nature* 480:245.
- 678 Bedford T, Hartl DL. 2009. Optimization of gene expression by natural selection. *Proceedings of the*  
679 *National Academy of Sciences* 106:1133-1138.
- 680 Benjamini Y, Hochberg Y. 1995. Controlling the false discovery rate: a practical and powerful approach to  
681 multiple testing. *Journal of the royal statistical society. Series B (Methodological)*:289-300.
- 682 Bergey CM, Phillips-Conroy JE, Disotell TR, Jolly CJ. 2016. Dopamine pathway is highly diverged in  
683 primate species that differ markedly in social behavior. *Proceedings of the National Academy of*  
684 *Sciences* 113:6178-6181.
- 685 Berthelot C, Villar D, Horvath JE, Odom DT, Flicek P. 2018. Complexity and conservation of regulatory  
686 landscapes underlie evolutionary resilience of mammalian gene expression. *Nature Ecology &*  
687 *Evolution* 2:152.
- 688 Bindea G, Mlecnik B, Hackl H, Charoentong P, Tosolini M, Kirilovsky A, Fridman W-H, Pagès F, Trajanoski  
689 Z, Galon J. et al. 2009. ClueGO: a Cytoscape plug-in to decipher functionally grouped gene  
690 ontology and pathway annotation networks. *Bioinformatics* 25:1091-1093.
- 691 Blekhman R, Marioni JC, Zumbo P, Stephens M, Gilad Y. 2010. Sex-specific and lineage-specific  
692 alternative splicing in primates. *Genome Research* 20:180-189.



- 693 Blehman R, Oshlack A, Chabot AE, Smyth GK, Gilad Y. 2008. Gene regulation in primates evolves under  
694 tissue-specific selection pressures. *PLoS Genetics* 4:e1000271.
- 695 Boyle P, Clement K, Gu H, Smith ZD, Ziller M, Fostel JL, Holmes L, Meldrim J, Kelley F, Gnirke A. 2012.  
696 Gel-free multiplexed reduced representation bisulfite sequencing for large-scale DNA  
697 methylation profiling. *Genome Biology* 13:R92.
- 698 Brawand D, Soumillon M, Necsulea A, Julien P, Csárdi G, Harrigan P, Weier M, Liechti A, Aximu-Petri A,  
699 Kircher M. et al. 2011. The evolution of gene expression levels in mammalian organs. *Nature*  
700 478:343-348.
- 701 Britten RJ, Davidson EH. 1971. Repetitive and non-repetitive DNA sequences and a speculation on the  
702 origins of evolutionary novelty. *Quarterly Review of Biology*:111-138.
- 703 Butler MA, King AA. 2004. Phylogenetic comparative analysis: a modeling approach for adaptive  
704 evolution. *The American Naturalist* 164:683-695.
- 705 Carja O, Maclsaac JL, Mah SM, Henn BM, Kobor MS, Feldman MW, Fraser HB. 2017. Worldwide patterns  
706 of human epigenetic variation. *Nature Ecology and Evolution* 1:1577.
- 707 Charpentier MJ, Fontaine MC, Chereil E, Renoult JP, Jenkins T, Benoit L, Barthes N, Alberts SC, Tung J.  
708 2012. Genetic structure in a dynamic baboon hybrid zone corroborates behavioural  
709 observations in a hybrid population. *Molecular Ecology* 21:715-731.
- 710 Colosimo PF, Hosemann KE, Balabhadra S, Villarreal G, Dickson M, Grimwood J, Schmutz J, Myers RM,  
711 Schluter D, Kingsley DM, et al. 2005. Widespread parallel evolution in sticklebacks by repeated  
712 fixation of ectodysplasin alleles. *Science* 307:1928-1933.
- 713 Colosimo PF, Peichel CL, Nereng K, Blackman BK, Shapiro MD, Schluter D, Kingsley DM. 2004. The  
714 genetic architecture of parallel armor plate reduction in threespine sticklebacks. *PLoS Biology*  
715 2:e109.
- 716 Coolon JD, McManus CJ, Stevenson KR, Graveley, BR, & Wittkopp PJ. 2014. Tempo and mode of  
717 regulatory evolution in *Drosophila*. *Genome Research* 24(5), 797-808.
- 718 Cunningham F, Amode MR, Barrell D, Beal K, Billis K, Brent S, Carvalho-Silva D, Clapham P, Coates G,  
719 Fitzgerald S, et al. 2015. Ensembl 2015. *Nucleic Acids Research* 43: D662-D669.
- 720 Degner JF, Pai AA, Pique-Regi R, Veyrieras J-B, Gaffney DJ, Pickrell JK, De Leon S, Michelini K, Lewellen N,  
721 Crawford GE, et al. 2012. DNase I sensitivity QTLs are a major determinant of human expression  
722 variation. *Nature* 482:390-394.
- 723 Denver DR, Morris K, Streelman JT, Kim SK, Lynch M, Thomas WK. 2005. The transcriptional  
724 consequences of mutation and natural selection in *Caenorhabditis elegans*. *Nature Genetics*  
725 37:544.
- 726 Dolzhenko E, Smith AD. 2014. Using beta-binomial regression for high-precision differential methylation  
727 analysis in multifactor whole-genome bisulfite sequencing experiments. *BMC Bioinformatics*  
728 15:215.
- 729 Dubin MJ, Zhang P, Meng D, Remigereau M-S, Osborne EJ, Casale FP, Drewe P, Kahles A, Jean G,  
730 Vilhjálmsson B, et al. 2015. DNA methylation in *Arabidopsis* has a genetic basis and shows  
731 evidence of local adaptation. *eLife* 4:e05255.
- 732 Feil R, Fraga MF. 2012. Epigenetics and the environment: emerging patterns and implications. *Nature*  
733 *Reviews Genetics* 13:97-109.

- 734 Ford EE, Grimmer MR, Stolzenburg S, Bogdanovic O, de Mendoza A, Franham PJ, Blancafort P, Lister R.  
735 2017. Frequent lack of repressive capacity of promoter DNA methylation identified through  
736 genome-wide epigenomic manipulation. *bioRxiv*: 170506.
- 737 Fraser HB, Lam LL, Neumann SM, Kobor MS. 2012. Population-specificity of human DNA methylation.  
738 *Genome Biology* 13:R8.
- 739 Gallego Romero I, Ruvinsky I, Gilad Y. 2012. Comparative studies of gene expression and the evolution of  
740 gene regulation. *Nature Reviews Genetics* 13:505-516.
- 741 Gate RE, Cheng CS, Aiden AP, Siba A, Tabaka M, Lituiev D, Machol I, Godon MG, Subramaniam M,  
742 Shamim M, et al. 2018. Genetic determinants of co-accessible chromatin regions in activated T  
743 cells across humans. *Nature genetics*.
- 744 Geeleher P, Hartnett L, Egan LJ, Golden A, Raja Ali RA, Seoighe C. 2013. Gene-set enrichment is severely  
745 biased when applied to genome-wide methylation data. *Bioinformatics* 29:1851-1857.
- 746 Gilad Y, Oshlack A, Smyth GK, Speed TP, White KP. 2006. Expression profiling in primates reveals a rapid  
747 evolution of human transcription factors. *Nature* 440:242-245.
- 748 Gilad Y, Oshlack A, Rifkin SA. 2006. Natural selection on gene expression. *Trends in Genetics* 22:456-461.
- 749 Gore AV, Tomins KA, Iben J, Ma L, Castranova D, Davis AE, Parkhurst A, Jeffery WR, Weinstein BM. 2018.  
750 An epigenetic mechanism for cavefish eye degeneration. *Nature Ecology & Evolution*.
- 751 Gu H, Smith ZD, Bock C, Boyle P, Gnirke A, Meissner A. 2011. Preparation of reduced representation  
752 bisulfite sequencing libraries for genome-scale DNA methylation profiling. *Nature Protocols*  
753 6:468-481.
- 754 Hansen KD, Langmead B, Irizarry RA. 2012. BSmooth: from whole genome bisulfite sequencing reads to  
755 differentially methylated regions. *Genome Biology* 13:R83.
- 756 Haygood R, Babbitt CC, Fedrigo O, Wray GA. 2010. Contrasts between adaptive coding and noncoding  
757 changes during human evolution. *Proceedings of the National Academy of Sciences* 107:7853-  
758 7857.
- 759 Heliconius Genome Consortium. 2012. Butterfly genome reveals promiscuous exchange of mimicry  
760 adaptations among species. *Nature* 487:94-98.
- 761 Hernandez RD, Uricchio LH, Hartman K, Ye J, Dahl A, Zaitlen N. 2017. Singleton Variants Dominate the  
762 Genetic Architecture of Human Gene Expression. *bioRxiv*:219238.
- 763 Hernando-Herraez I, Heyn H, Fernandez-Callejo M, Vidal E, Fernandez-Bellon H, Prado-Martinez J, Sharp  
764 AJ, Esteller M, Marques-Bonet T. 2015. The interplay between DNA methylation and sequence  
765 divergence in recent human evolution. *Nucleic Acids Research* 43:8204-8214.
- 766 Hernando-Herraez I, Prado-Martinez J, Garg P, Fernandez-Callejo M, Heyn H, Hvilsom C, Navarro A,  
767 Esteller M, Sharp AJ, Marques-Bonet T. 2013. Dynamics of DNA methylation in recent human  
768 and great ape evolution. *PLoS Genetics* 9:e1003763.
- 769 Heyn H, Moran S, Hernando-Herraez I, Sayols S, Gomez A, Sandoval J, Monk D, Hata K, Marques-Bonet T,  
770 Wang L, et al. 2013. DNA methylation contributes to natural human variation. *Genome Research*  
771 23:1363-1372.
- 772 Hodgins-Davis A, Rice DP, & Townsend JP. (2015). Gene expression evolves under a house-of-cards  
773 model of stabilizing selection. *Molecular Biology and Evolution* 32: 2130-2140.

- 774 Irizarry RA, Ladd-Acosta C, Wen B, Wu Z, Montano C, Onyango P, Cui H, Gabo K, Rongione M, Webster  
775 M, et al. 2009. The human colon cancer methylome shows similar hypo-and hypermethylation  
776 at conserved tissue-specific CpG island shores. *Nature Genetics* 41:178-186.
- 777 Jacob F. 1977. Evolution and tinkering. *Science* 196: 1161-1166.
- 778 Jirtle RL, Skinner MK. 2007. Environmental epigenomics and disease susceptibility. *Nature Reviews*  
779 *Genetics* 8:253-262.
- 780 Jolly CJ. 1993. Species, subspecies, and baboon systematics. In *Species, species concepts and primate*  
781 *evolution*. Springer, Boston, MA: 67-107.
- 782 Jones FC, Grabherr MG, Chan YF, Russell P, Mauceli E, Johnson J, Swofford R, Pirun M, Zody MC, White S,  
783 et al. 2012. The genomic basis of adaptive evolution in threespine sticklebacks. *Nature* 484:55-  
784 61.
- 785 Jones PA. 2012. Functions of DNA methylation: islands, start sites, gene bodies and beyond. *Nature*  
786 *Reviews Genetics* 13:484-492.
- 787 Karolchik D, Barber GP, Casper J, Clawson H, Cline MS, Diekhans M, et al. 2014. The UCSC Genome  
788 Browser database: 2014 update. *Nucleic Acids Research* 42: 764–770.
- 789 Keller C, Roos C, Groeneveld L, Fischer J, Zinner D. 2010. Introgressive hybridization in southern African  
790 baboons shapes patterns of mtDNA variation. *American Journal of Physical Anthropology*  
791 142:125-136.
- 792 Khaitovich P, Tang K, Franz H, Kelso J, Hellmann I, Enard W, Lachmann M, Pääbo S. 2006. Positive  
793 selection on gene expression in the human brain. *Current Biology* 16:R356-R358.
- 794 Kim-Hellmuth S, Bechheim M, Puetz B, Mohammadi P, Nedelec Y, Giangreco N, Becker J, Kaiser V,  
795 Fricker N, Beier E, et al. 2017. Genetic regulatory effects modified by immune activation  
796 contribute to autoimmune disease associations. *Nature Communications*:116376.
- 797 King M, Wilson A. 1975. Evolution at two levels in humans and chimpanzees. *Science* 188:107-116.
- 798 Klose RJ, Bird AP. 2006. Genomic DNA methylation: the mark and its mediators. *Trends in Biochemical*  
799 *Sciences* 31:89-97.
- 800 Kosiol C, Vinař T, da Fonseca RR, Hubisz MJ, Bustamante CD, Nielsen R, Siepel A. 2008. Patterns of  
801 positive selection in six mammalian genomes. *PLoS Genetics* 4:e1000144.
- 802 Laland K, Uller T, Feldman M, Sterelny K, Müller GB, Moczek A, Jablonka E, Odling-Smee J, Wray GE,  
803 Hoekstra HE, et al. 2014. Does evolutionary theory need a rethink? *Nature News* 514:161.
- 804 Lande R. 1976. Natural selection and random genetic drift in phenotypic evolution. *Evolution*:314-334.
- 805 Landry C, Lemos B, Rifkin SA, Dickinson W, Hartl DL. 2007. Genetic properties influencing the evolvability  
806 of gene expression. *Science* 317:118-121.
- 807 Lea AJ, Altmann J, Alberts SC, Tung J. 2016. Resource base influences genome-wide DNA methylation  
808 levels in wild baboons (*Papio cynocephalus*). *Molecular Ecology* 25(8): 1681-1696.
- 809 Lea AJ, Tung J, Zhou X. 2015. A Flexible, Efficient Binomial Mixed Model for Identifying Differential DNA  
810 Methylation in Bisulfite Sequencing Data. *PLoS Genetics* 11:e1005650.
- 811 Lea AJ, Vilgalys TP, Durst P, Tung J. 2017. Maximizing ecological and evolutionary insight from bisulfite  
812 sequencing data sets. *Nature Ecology and Evolution* 1(8): 1074.
- 813 Lea AJ, Vockley CM, Johnston RA, Del Carpio CA, Barreiro LB, Reddy TE, Tung J. 2017. Genome-wide  
814 quantification of the effects of DNA methylation on human gene regulation. *bioRxiv*:146829.
- 815 Leffler EM. 2017. Evolutionary insights from wild vervet genomes. *Nature Genetics* 49:1671.

- 816 Liu XS, Wu H, Ji X, Stelzer Y, Wu X, Czauderna S, Shu J, Dadon D, Young RA, Jaenisch R., et al. 2016.  
817 Editing DNA methylation in the mammalian genome. *Cell* 167:233-247. e217.
- 818 Maeder ML, Angstman JF, Richardson ME, Linder SJ, Cascio VM, Tsai SQ, Ho QH, Sanders JD, Reyon D,  
819 Bernstein BE, Costello JF. 2013. Targeted DNA demethylation and activation of endogenous  
820 genes using programmable TALE-TET1 fusion proteins. *Nature Biotechnology* 31:1137.
- 821 Manceau M, Domingues VS, Mallarino R, Hoekstra HE. 2011. The developmental role of Agouti in color  
822 pattern evolution. *Science* 331:1062-1065.
- 823 Mendizabal I, Shi L, Keller TE, Konopka G, Preuss TM, Hsieh T-F, Hu E, Zhang Z, Su B, Soojin VY. 2016.  
824 Comparative Methylome Analyses Identify Epigenetic Regulatory Loci of Human Brain Evolution.  
825 *Molecular Biology and Evolution* 33:2947-2959.
- 826 Nédélec Y, Sanz J, Baharian G, Szpiech ZA, Pacis A, Dumaine A, Grenier J-C, Freiman A, Sams AJ, Hebert S,  
827 et al. 2016. Genetic ancestry and natural selection drive population differences in immune  
828 responses to pathogens. *Cell* 167:657-669. e621.
- 829 Nei M, Li W-H. 1979. Mathematical model for studying genetic variation in terms of restriction  
830 endonucleases. *Proceedings of the National Academy of Sciences* 76:5269-5273.
- 831 Nicolae DL, Gamazon E, Zhang W, Duan S, Dolan ME, Cox NJ. 2010. Trait-associated SNPs are more likely  
832 to be eQTLs: annotation to enhance discovery from GWAS. *PLoS Genetics* 6:e1000888.
- 833 Nuzhdin SV, Wayne ML, Harmon KL, McIntyre LM. 2004. Common pattern of evolution of gene  
834 expression level and protein sequence in *Drosophila*. *Molecular Biology and Evolution* 21:1308-  
835 1317.
- 836 Pai AA, Bell JT, Marioni JC, Pritchard JK, Gilad Y. 2011. A genome-wide study of DNA methylation  
837 patterns and gene expression levels in multiple human and chimpanzee tissues. *PLoS Genetics*  
838 7:e1001316.
- 839 Pai AA, Gilad Y. 2014. Comparative studies of gene regulatory mechanisms. *Current Opinion in Genetics  
840 & Development* 29:68-74.
- 841 Perelman P, Johnson WE, Roos C, Seuánez HN, Horvath JE, Moreira MA, Kessing B, Pontius J, Roelke M,  
842 Rumpler Y, et al. 2011. A molecular phylogeny of living primates. *PLoS genetics* 7:e1001342.
- 843 Perry GH, Melsted P, Marioni JC, Wang Y, Bainer R, Pickrell JK, Michelini K, Zehr S, Yoder AD, Stephens  
844 M, et al. 2012. Comparative RNA sequencing reveals substantial genetic variation in endangered  
845 primates. *Genome Research* 22:602-610.
- 846 Poelstra JW, Vijay N, Bossu CM, Lantz H, Ryll B, Müller I, Baglione V, Unneberg P, Wikelski M, Grabherr  
847 MG, et al. 2014. The genomic landscape underlying phenotypic integrity in the face of gene flow  
848 in crows. *Science* 344:1410-1414.
- 849 Pollard KS, Salama SR, King B, Kern AD, Dreszer T, Katzman S, Siepel A, Pedersen JS, Bejerano G, Baertsch  
850 R, et al. 2006. Forces shaping the fastest evolving regions in the human genome. *PLoS Genetics*  
851 2:e168.
- 852 Prabhakar S, Noonan JP, Pääbo S, Rubin EM. 2006. Accelerated evolution of conserved noncoding  
853 sequences in humans. *Science* 314:786-786.
- 854 Prud'Homme B, Gompel N, Rokas A, Kassner VA, Williams TM, Yeh S-D, True JR, Carroll SB. 2006.  
855 Repeated morphological evolution through cis-regulatory changes in a pleiotropic gene. *Nature*  
856 440:1050.

- 857 Reed RD, Papa R, Martin A, Hines HM, Counterman BA, Pardo-Diaz C, Jiggins CD, Chamberlain NL,  
858 Kronforst MR, Chen R, et al. 2011. Optix drives the repeated convergent evolution of butterfly  
859 wing pattern mimicry. *Science* 333:1137-1141.
- 860 Rifkin SA, Houle D, Kim J, White KP. 2005. A mutation accumulation assay reveals a broad capacity for  
861 rapid evolution of gene expression. *Nature* 438:220.
- 862 Rifkin SA, Kim J, White KP. 2003. Evolution of gene expression in the *Drosophila melanogaster* subgroup.  
863 *Nature Genetics* 33:138-144.
- 864 Rogers J, Raveendran M, Harris RA, Mailund T, Leppala K, Athanasiadis G, Schierup MH, Cheng J, Munch  
865 K, Walker JA, et al. *in review*. The comparative genomics, epigenomics and complex population  
866 history of *Papio baboons*. *Science Advances*.
- 867 Rohlfsv RV, Nielsen R. 2014. Identifying adaptive and plastic gene expression levels using a unified model  
868 for expression variance between and within species. bioRxiv:004374.
- 869 Schmitz RJ, Schultz MD, Lewsey MG, O'Malley RC, Urich MA, Libiger O, Schork NJ, Ecker JR. 2011.  
870 Transgenerational epigenetic instability is a source of novel methylation variants. *Science*  
871 334:369-373.
- 872 Schoech A, Jordan D, Loh P-R, Gazal S, O'Connor L, Balick DJ, Palamara PF, Finucane H, Sunyaev SR, Price  
873 AL, et al. 2017. Quantification of frequency-dependent genetic architectures and action of  
874 negative selection in 25 UK Biobank traits. bioRxiv:188086.
- 875 Schultz AH. 1938. The relative weight of the testes in primates. *The Anatomical Record* 72:387-394.
- 876 Shapiro MD, Marks ME, Peichel CL, Blackman BK, Nereng KS, Jónsson B, Schluter D, Kingsley DM. 2004.  
877 Genetic and developmental basis of evolutionary pelvic reduction in threespine sticklebacks.  
878 *Nature* 428:717-723.
- 879 Shibata Y, Sheffield NC, Fedrigo O, Babbitt CC, Wortham M, Tewari AK, London D, Song L, Lee B-K, Iyer  
880 VR, et al. 2012. Extensive evolutionary changes in regulatory element activity during human  
881 origins are associated with altered gene expression and positive selection. *PLoS Genetics*  
882 8:e1002789.
- 883 Signor SA, Nuzhdin SV. 2018. The Evolution of Gene Expression in cis and trans. *Trends in Genetics*.
- 884 Stern DL. 2000. Perspective: evolutionary developmental biology and the problem of variation. *Evolution*  
885 54:1079-1091.
- 886 Stern DL, Orgogozo V. 2008. The loci of evolution: how predictable is genetic evolution? *Evolution*  
887 62:2155-2177.
- 888 Storey JD, Tibshirani R. 2003. Statistical significance for genomewide studies. *Proceedings of the*  
889 *National Academy of Sciences* 100:9440-9445.
- 890 Sudmant PH, Alexis MS, Burge CB. 2015. Meta-analysis of RNA-seq expression data across species,  
891 tissues and studies. *Genome Biology* 16:287.
- 892 Sun D, Xi Y, Rodriguez B, Park HJ, Tong P, Meong M, Goodell MA, Li W. 2014. MOABS: model based  
893 analysis of bisulfite sequencing data. *Genome Biology* 15:R38.
- 894 Swedell L. 2011. Baboons, Mandrills, and Mangabeys. In: Campbell CJ, Fuentes A, MacKinnon KC,  
895 Panger M, Bearder SK, editors. *Primates in Perspective*: Oxford University Press.
- 896 Tung J, Barreiro LB. 2017. The contribution of admixture to primate evolution. *Current Opinion in*  
897 *Genetics & Development* 47:61.

- 898 van der Graaf A, Wardenaar R, Neumann DA, Taudt A, Shaw RG, Jansen RC, Schmitz RJ, Colomé-Tatché  
899 M, Johannes F. 2015. Rate, spectrum, and evolutionary dynamics of spontaneous epimutations.  
900 *Proceedings of the National Academy of Sciences* 112:6676-6681.
- 901 Verhoeven KJ, Vonholdt BM, Sork VL. 2016. Epigenetics in ecology and evolution: what we know and  
902 what we need to know. *Molecular Ecology* 25:1631-1638.
- 903 Villar D, Berthelot C, Aldridge S, Rayner TF, Lukk M, Pignatelli M, Park TJ, Deaville R, Erichsen JT, Jasinska  
904 AJ, et al. 2015. Enhancer evolution across 20 mammalian species. *Cell* 160:554-566.
- 905 Wall JD, Schlebusch SA, Alberts SC, Cox LA, Snyder-Mackler N, Nevenon K, Carbone L, Tung J. 2016.  
906 Genome-wide ancestry and divergence patterns from low-coverage sequencing data reveal a  
907 complex history of admixture in wild baboons. *Molecular Ecology* 25:3469-3483.
- 908 Weber M, Hellmann I, Stadler MB, Ramos L, Pääbo S, Rebhan M, Schübeler D. 2007. Distribution,  
909 silencing potential and evolutionary impact of promoter DNA methylation in the human  
910 genome. *Nature genetics* 39:457.
- 911 Whitehead A, Crawford DL. 2006. Variation within and among species in gene expression: raw material  
912 for evolution. *Molecular Ecology* 15:1197-1211.
- 913 Wray GA. 2007. The evolutionary significance of cis-regulatory mutations. *Nature Reviews Genetics*  
914 8:206-216.
- 915 Wray GA. 2013. Genomics and the evolution of phenotypic traits. *Annual Review of Ecology, Evolution,  
916 and Systematics* 44:51-72.
- 917 Xi Y, Li W. 2009. BSMAP: whole genome bisulfite sequence MAPPING program. *BMC bioinformatics* 10:1.
- 918 Zeng J, Konopka G, Hunt BG, Preuss TM, Geschwind D, Soojin VY. 2012. Divergent whole-genome  
919 methylation maps of human and chimpanzee brains reveal epigenetic basis of human regulatory  
920 evolution. *The American Journal of Human Genetics* 91:455-465.
- 921 Zhou X, Cain CE, Myrthil M, Lewellen N, Michelini K, Davenport ER, Stephens M, Pritchard JK, Gilad Y.  
922 2014. Epigenetic modifications are associated with inter-species gene expression variation in  
923 primates. *Genome Biology* 15:547.
- 924 Zinner D, Groeneveld LF, Keller C, Roos C. 2009. Mitochondrial phylogeography of baboons (*Papio* spp.):  
925 indication for introgressive hybridization? *BMC Evolutionary Biology* 9:83.
- 926 Zinner D, Wertheimer J, Liedigk R, Groeneveld LF, Roos C. 2013. Baboon phylogeny as inferred from  
927 complete mitochondrial genomes. *American Journal of Physical Anthropology* 150:133-140.
- 928
